# Supplementary material for: Decoupling tRNA promoter and processing activities enables specific Pol-II Cas9 guide RNA expression
Source: PubMed Central journal article supplement (PMC6445147; doi:10.1038/s41467-019-09148-3), 2019-04-02
Supplement: 41467_2019_9148_MOESM1_ESM.pdf [file 41467_2019_9148_MOESM1_ESM.pdf]

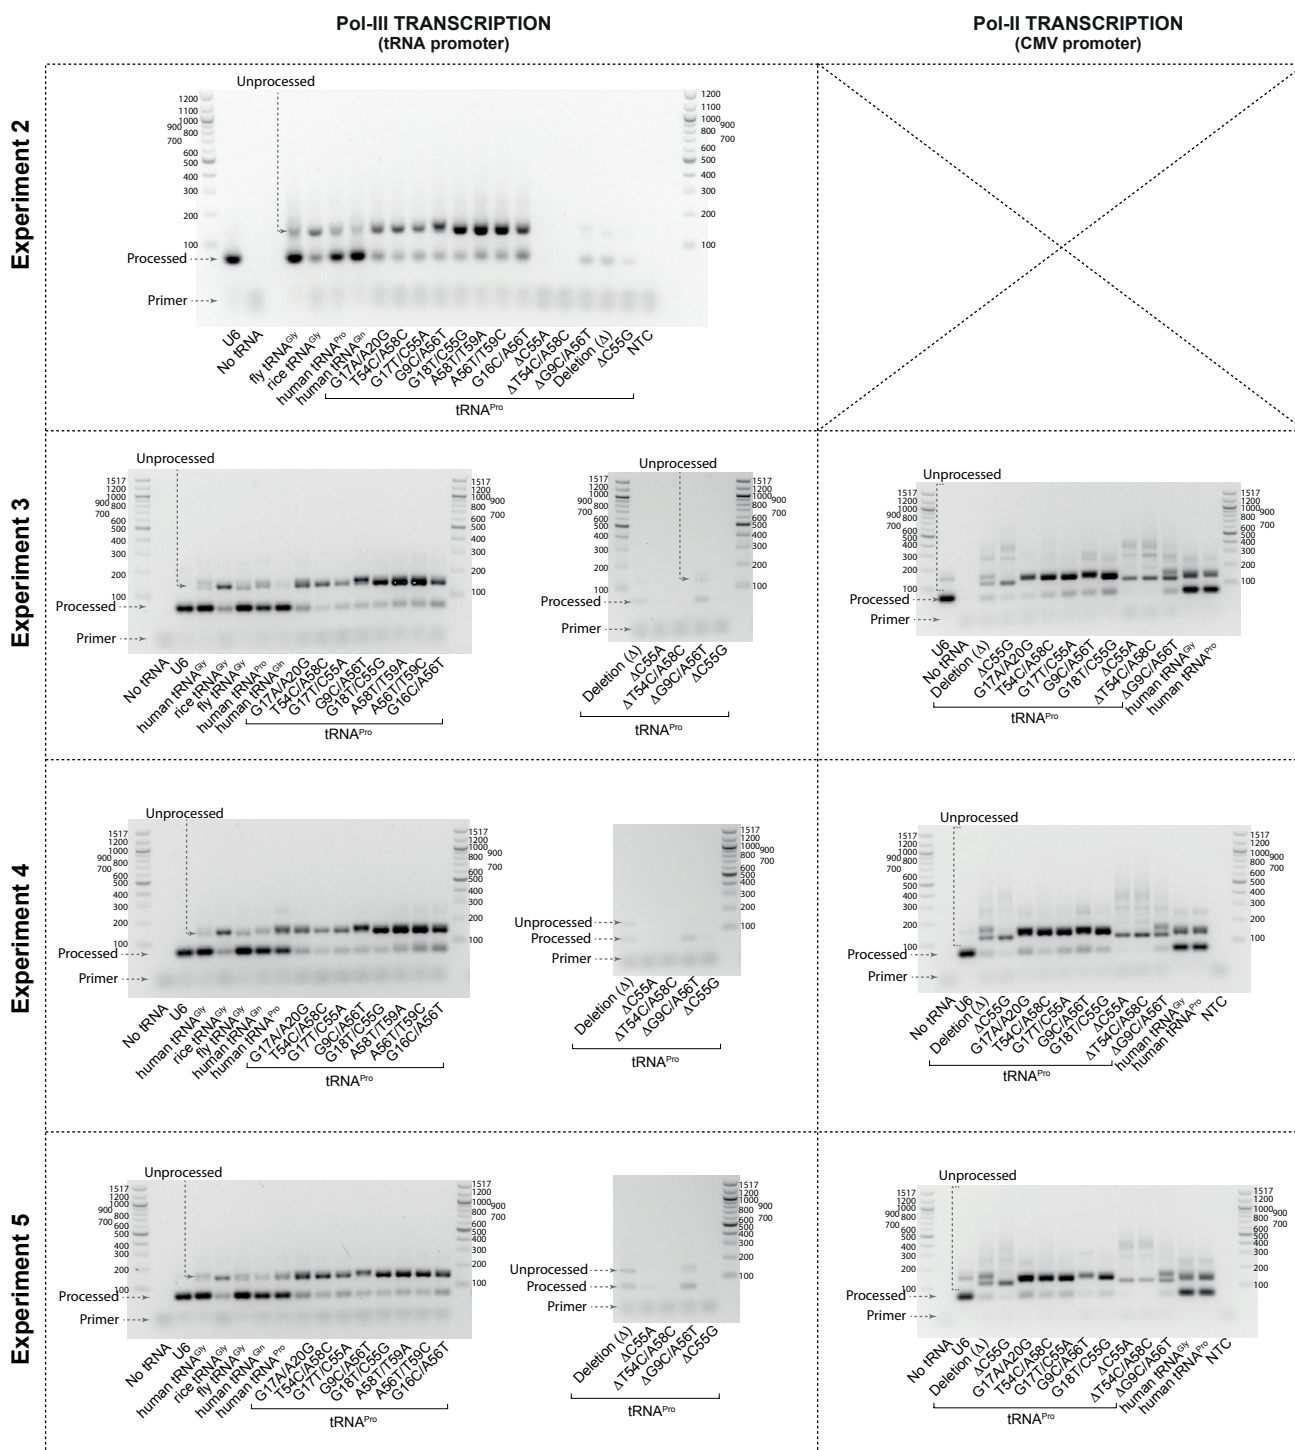

**Supplementary Figure 1. Agarose gel images used to determine processing efficiency.** Gel images are shown for each experiment in which the RNA circularization assay was performed. Images from constructs with no external promoter are shown in the left column and those which had a PoI-II (CMV) promoter on the right. For PoI-II promoter containing assays RNA was first dephosphorylated prior to circularization. Size in base pairs (bp) are shown for all ladders. The approximate location of successfully processed bands, unprocessed bands, and residual primer are noted on each gel. Saturated pixels (where present) are shown in green.

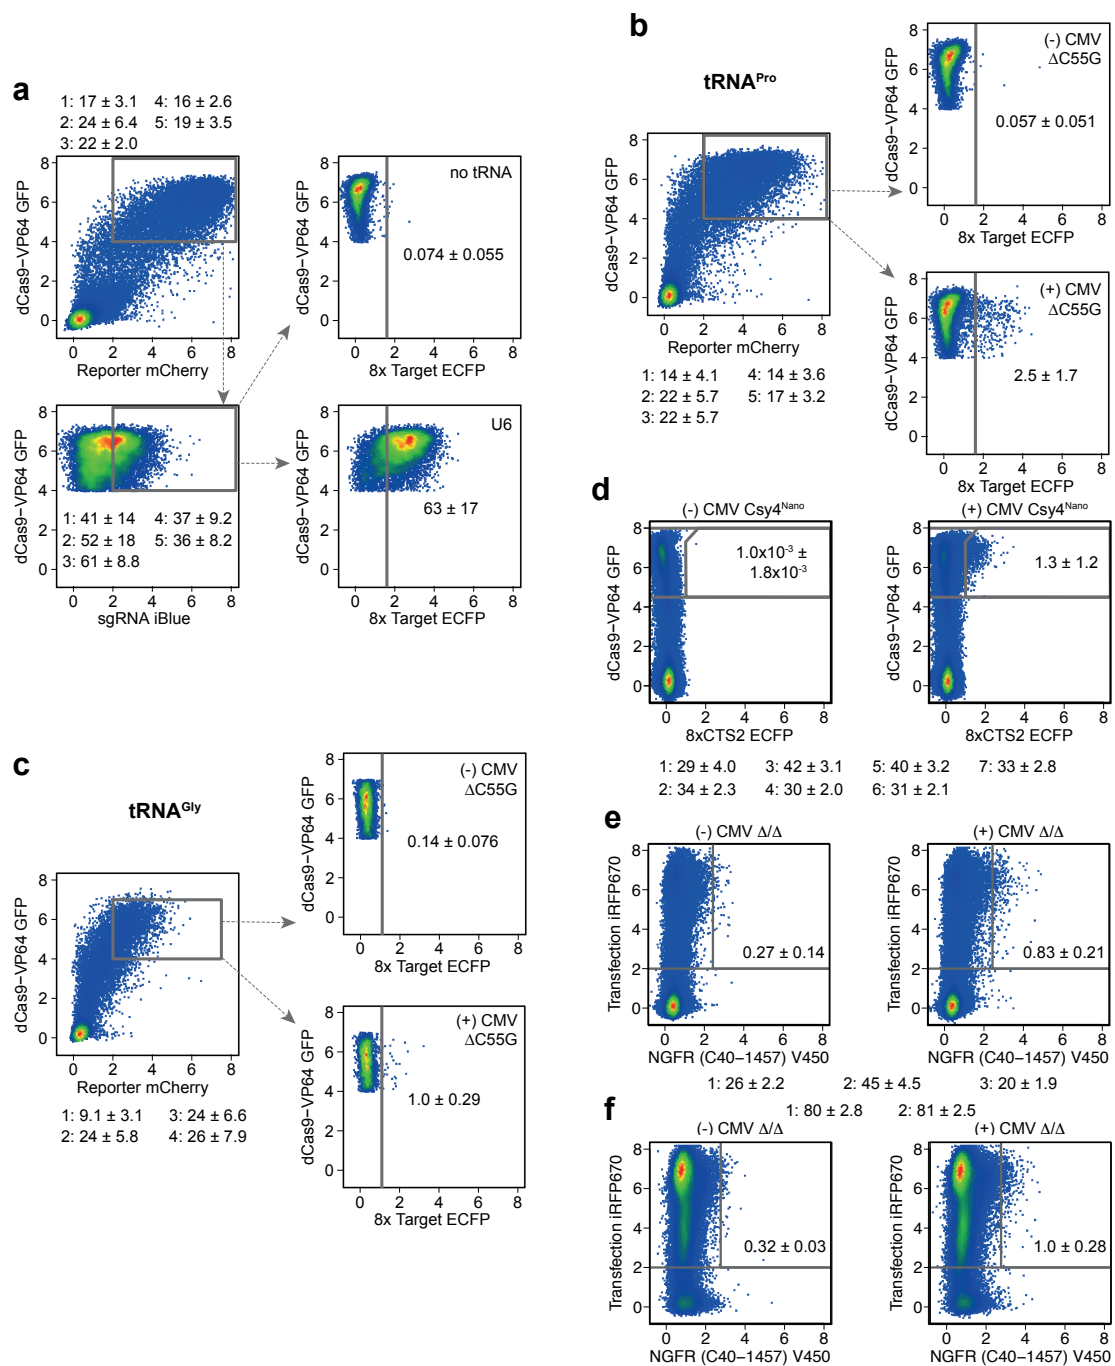

**Supplementary Figure 2. Representative gating strategies used in the manuscript. (a)** Gating hierarchy used in all tRNA<sup>Pro</sup> promoter testing experiments. Axes represent the asinh(ECFP<sub>fluorescence</sub>/150) of the fluorescence measurement (similar to a biexponential transformation). Values shown are mean  $\pm$  s.d. for each experiment for the first two gates, and the mean  $\pm$  s.d. across experiments for the final gate for the two examples shown. Plasmids expressed EGFP (dCas9-VP64), mCherry (in the reporter backbone), or iBlue (in the tRNA-sgRNA plasmids). Final ECFP gating was performed on cells positive for all requisite plasmids. In some cases, a maximum threshold was set on EGFP fluorescence where spillover would have been an issue. **(b, c)** Example of gating strategy for ON-OFF ratio used for tRNA<sup>Pro</sup> **(b)** and for tRNA<sup>Gly</sup> **(c)**. Mean  $\pm$  s.d. is shown per experiment for the first gate, and for the subsequent example final gates the mean  $\pm$  s.d. across replicates is shown. In these instances, iBlue gating was not used in the gRNA plasmids as preliminary experiments suggested a crosstalk with the CMV promoter. **(d)** Gating strategy for alternative methods of gRNA processing. In this case only the EGFP on dCas9-VP64 was retained as other colors conflicted with some used in the alternative strategies. Mean  $\pm$  s.d. % EGFP<sup>+</sup> are shown for each experiment. Mean  $\pm$  s.d. % ECFP<sup>+</sup> (of EGFP<sup>+</sup>) are shown across replicates for the selected examples. **(e, f)** Example gating for NGFR activation experiments without antibiotic selection 3 days after transfection **(e)** and with selection 4 days after transfection **(f)**. Mean  $\pm$  s.d. % iRFP670<sup>+</sup> (transfection control positive) are shown for each experiment. Mean  $\pm$  s.d. % NGFR<sup>+</sup> (of iRFP670<sup>+</sup>) are shown across replicates for the selected examples.

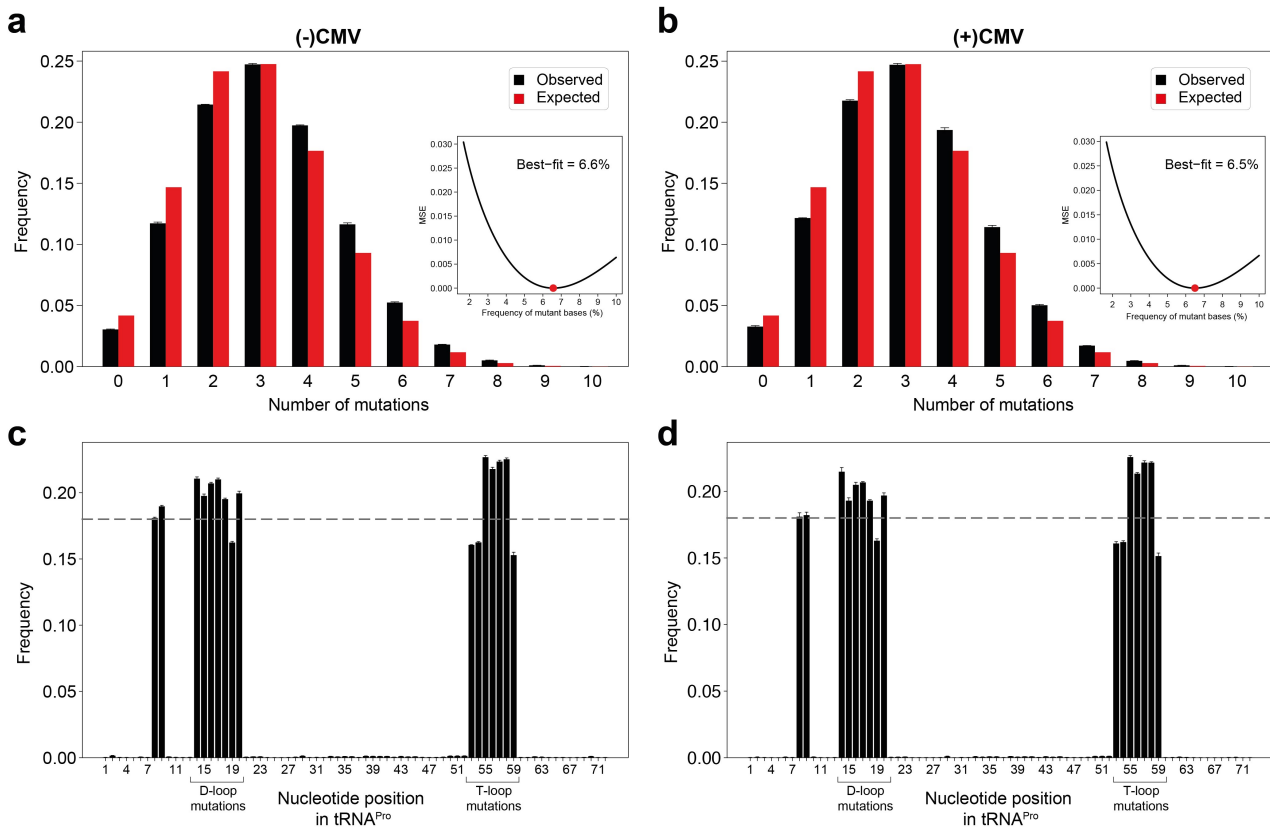

**Supplementary Figure 3. Mutation frequency and location in the tRNA screening libraries. (a, b)** Frequencies for each number of mutations observed in the plasmid library without **(a)** and with **(b)** CMV promoters. The expected frequency based on the 6% of each non-WT base in the ordered oligo pool is shown in red. Black bars represent the frequency across three biological replicates for each library (mean  $\pm$  s.d.). Insets show the mean-squared error (m.s.e.) of the measured mutational frequency compared to expected with differing frequencies of non-WT bases. Optimal fits are shown by red points and indicated in text. Best fits (minimum m.s.e.) are estimated at 6.6% and 6.5% without and with CMV promoters respectively, which closely match the 6% in the ordered pool. These results suggest that the diversity was not bottlenecked at any point in the protocol. **(c, d)** The frequency of mutations by location in the tRNA is shown for plasmid libraries without **(c)** or with **(d)** CMV promoters ( $n = 3$  biological replicates, mean  $\pm$  s.d.). These results confirm that mutant bases are specific for the targeted nucleotides. The expected overall mutation rate of 18% (given 6% of each non-WT base) is shown as a dotted line. Source data are provided as a Source Data file.

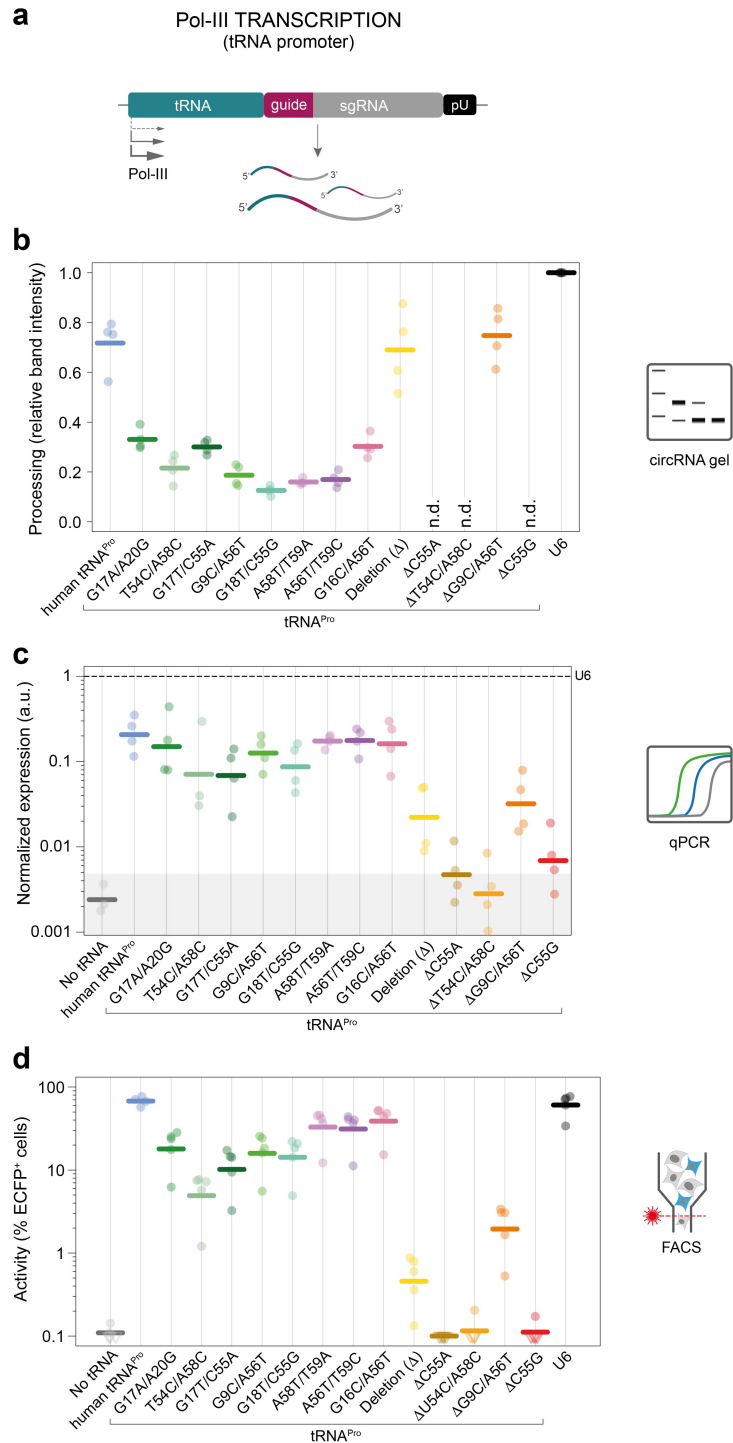

**Supplementary Figure 4. Characterization of promoter, 3' processing and background gRNA production of engineered tRNA scaffolds.** (a) Constructs and resulting RNA used for testing Pol-III promoter activity. (b) 3' processing ability of each mutant tRNA tested ( $n = 4$  independent experiments). Wild-type tRNA<sup>Pro</sup> and U6 controls are shown for reference from Fig. 1d. Efficiency represents the ratio of band intensity between the unprocessed and processed bands on a 2% agarose gel following RNA circularization and nested RT-PCR (thick lines = mean values; ND = variants with no detectable bands). All double-mutants showed some loss of 3' processing compared to wild-type > 95% probability (paired BEST test). (c) gRNA expression as measured by qPCR relative to Cas9 and U6 ( $\Delta\Delta Ct$ ) ( $n = 4$  independent experiments,  $n = 3$  for no promoter control; dashed line = gRNA levels for U6) (U6, 'no tRNA', human tRNA<sup>Pro</sup> and tRNA<sup>Gly</sup> are shared with Fig. 1c). Shaded area represents the 75% credible mass (BEST test) for the no tRNA control. The T54C/A58C, G17T/C55A and G18T/C55G double-mutants predicted to decrease promoter activity (green tones) had a >80% probability, and all  $\Delta$ tRNA scaffolds showed > 95% probability of decreased promoter activity compared to wild-type (paired BEST tests). (d) Percent reporter ECFP<sup>+</sup> cells within all transfected cells (thick lines = geometric mean values; each point = independent experiment;  $n = 4-5$ ). U6, wild-type tRNA<sup>Pro</sup>, and no promoter controls are shared with Fig. 1e, f, and 3d, e. (hollow downward triangles = points at or below the limit of detection). Double-mutants affecting only processing (pink tones) had somewhat decreased functional activity compared to wild-type > 99% probability, while those affecting promoter activity were even lower with >99% probability of decrease compared to all processing double-mutants (paired BEST tests). Source data are provided as a Source Data file.

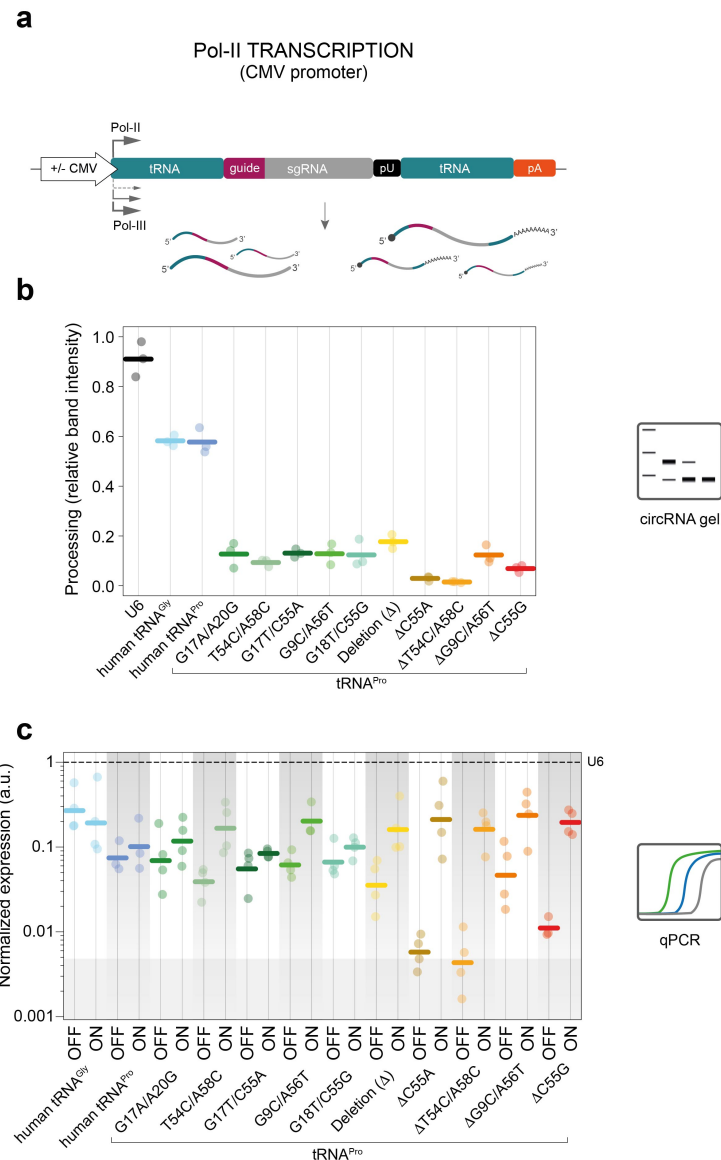

**Supplementary Figure 5. Characterization of engineered tRNA scaffolds overall processing and ON/OFF ratios in the presence and absence of Pol-II promoter.** (a) Diagram of constructs used to test ON/OFF ratios in presence and absence of a Pol-II promoter (shared with Fig. 3c). (b) Overall processing ability of each mutant tRNA tested ( $n = 4$  independent experiments). Efficiency represents the ratio of band intensity between the processed band and all other bands in the lane on a 2% agarose gel following decapping, RNA circularization and nested RT-PCR (thick lines = mean values). (c) gRNA expression for each mutation in the presence (ON) and absence (OFF) of a Pol-II promoter (CMV) as measured by qPCR relative to Cas9 and U6 ( $\Delta\Delta Ct$ ) ( $n = 4$  independent experiments,  $n = 3$  for no promoter control; dashed line = gRNA levels for U6) (U6 and 'no tRNA' are shared with Fig. 1c and Supplementary Fig. 4c). Shaded area represents the 75% credible mass (BEST test) for the no tRNA control. Source data are provided as a Source Data file.

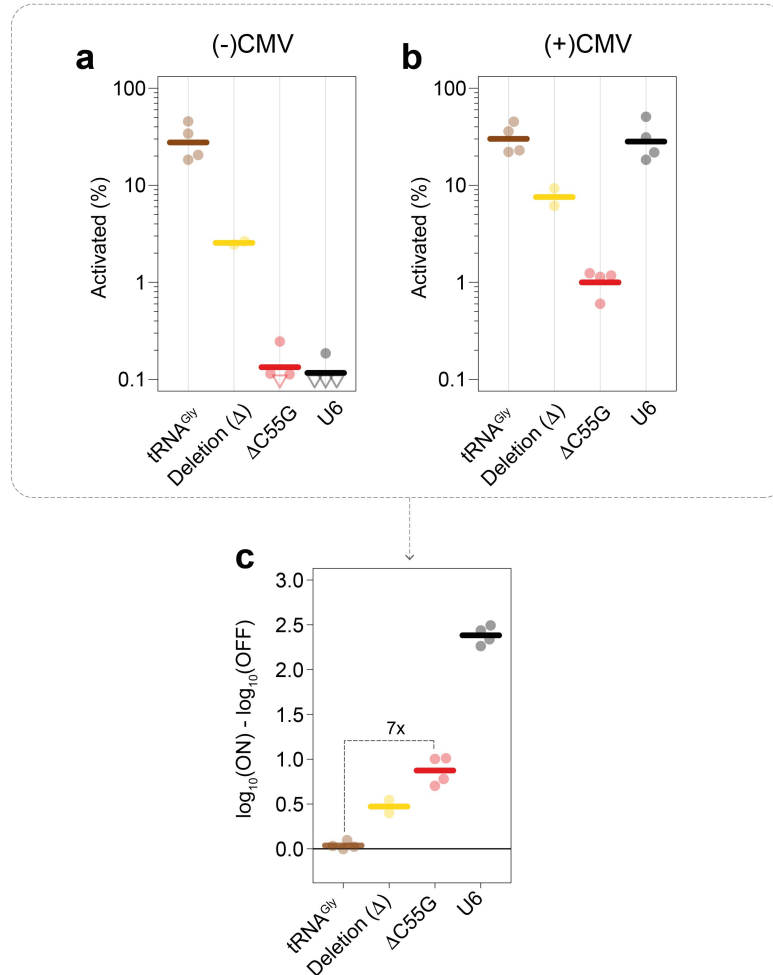

**Supplementary Figure 6. The new engineered scaffold is generalizable to other human tRNAs.** (a, b) Percentage reporter ECFP<sup>+</sup> cells within transfected cells for the tRNA<sup>Gly</sup> constructs with (a) and without (b) CMV promoters. Points at or below the limit of detection are shown as hollow downward triangles. (c) Log<sub>10</sub>(% ECFP<sup>+</sup> cells) in the ON condition (with CMV promoter) compared to OFF condition (no CMV promoter) for the tRNA<sup>Gly</sup> constructs (n = 2-4 independent experiments). Thick lines represent mean values. Source data are provided as a Source Data file.

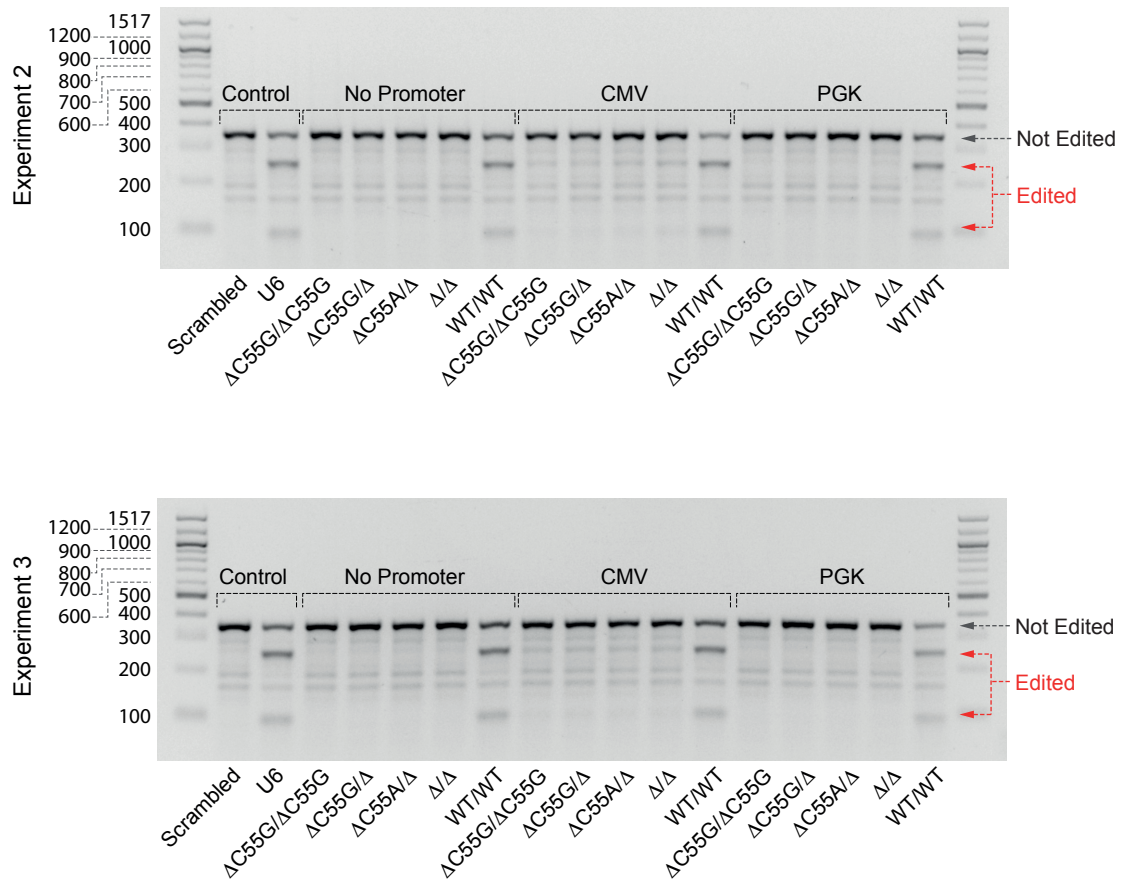

**Supplementary Figure 7. T7 endonuclease assay gel images for PDL1 editing.** tRNA scaffolds are shown beneath each plot with the 5' variant / 3' variant indicated. A U6 promoter with a scrambled gRNA or with the targeting gRNA are included as controls. Pol-II promoters for each set are noted above their respective lanes. Size in base pairs (bp) are shown next to the left side ladder. Black arrow = the location of uncut (not edited) amplicons; red arrows = digested (edited) amplicons (see Figure 5 for experiment 1 gel).

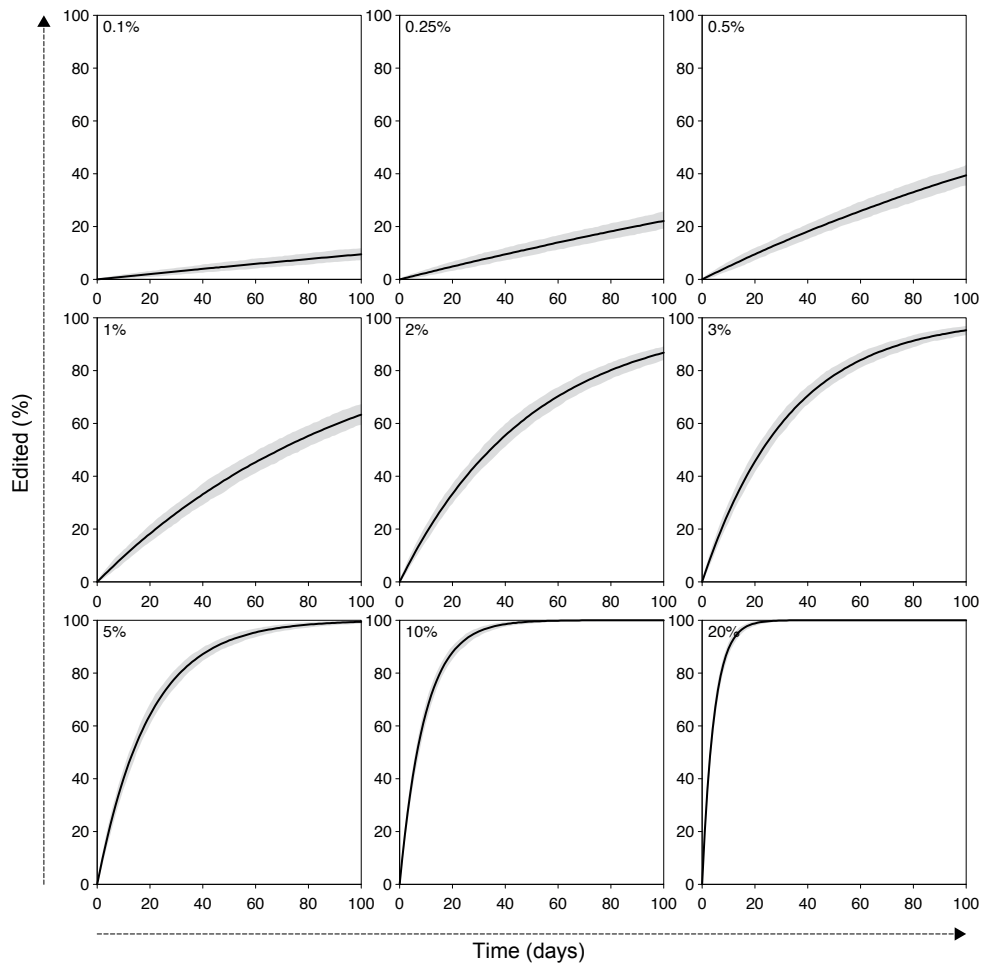

**Supplementary Figure 8. Mathematical modeling of indel frequency over time with varying daily editing rates.** Results represent 1000 simulated cells each run with a daily binomial probability of editing as indicated in the top left. Time was simulated up to day 100. Lines represent the median value of 1000 replicate simulations, and shaded areas encompass 99% of the total probability distribution.



## Supplementary Notes

### *Modular cloning backbone gBlock sequence*

CAGTGCAAGTGCAGGTGCCAGAACATTTCTCTGGGCCCCGCCGGTACCTTCTAGAGGC  
TAGGGATGAAGAATAAAAGGGGCGCGCCCCTAGGGAGCGGGGGGCTATAAAAGGGG  
GTGGGGGCGTTTCGTCTGCTATCTAGCGTCGCGTTGACCGAGCTCATCGGTGCATGG  
GTGGTTCAGTGGTAGAATTCTCGCCTGCCACGCGGGAGGCCCGGGTTCGATTCCCGG  
CCCATGCAGGAGACGGACGTCTCCGTTTTAGAGCTAGGCCAACATGAGGATCACCCAT  
GTCTGCAGGGCCTAGCAAGTTAAAATAAGGCTAGTCCGTTATCAACTTGGCCAACATGA  
GGATCACCCATGTCTGCAGGGCCAAGTGGCACCAGTCCGGTGAACAAAGCACCAAGT  
GGTCTAGTGGTGGAAATAGTACCCTGCCACGGTACAGACCCGGGTTCGATTCCCGGCTG  
GTGCAGGCCCGGCCGC

### *HDV ribozyme sequence*

GGCCGGCATGGTCCCAGCCTCCTCGCTGGCGCCGGCTGGGCAACATGCTTCGGCATG  
GCGAATGGGAC

### *mKate intronic sgRNA2.0 gBlock*

GCCACCATGGTGTCTAAGGGCGAAGAGCTGATTAAGGAGAACATGCACATGAAGCTGT  
ACATGGAGGGCACCGTGAACAACCACCACTTCAAGTGCACATCCGAGGGCGAAGGCA  
AGCCCTACGAGGGCACCCAGACCATGAGAATCAAGGTGGTTCGAGGGCGGCCCTCTCC  
CCTTCGCCTTCGACATCCTGGCTACCAGCTTCATGTACGGCAGCAAAACCTTCATCAAC  
CACACCCAGGGCATCCCCGACTTCTTTAAGCAGTCCTTCCCTGAGGTAAGTGGTCCGG  
AGACGGACGTCTCCGTTTTAGAGCTAGGCCAACATGAGGATCACCCATGTCTGCAGGG  
CCTAGCAAGTTAAAATAAGGCTAGTCCGTTATCAACTTGGCCAACATGAGGATCACCCA  
TGTCTGCAGGGCCAAGTGGCACCAGTCCGGTGCCTAAGTTCGAGTCTTCTTTTTTTTT  
TTCACAGGGCTTCACATGGGAGAGAGTACCACATACGAAGACGGGGGCGTGCTGAC  
CGCTACCCAGGACACCAGCCTCCAGGACGGCTGCCTCATCTACAACGTCAAGATCAGA  
GGGGTGAACCTCCCATCCAACGGCCCTGTGATGCAGAAGAAAACACTCGGCTGGGAG  
GCCTCCACCGAGATGCTGTACCCCGCTGACGGCGGCCTGGAAGGCAGAAGCGACATG  
GCCCTGAAGCTCGTGGGCGGGGGCCACCTGATCTGCAACTTGAAGACCACATACAGAT  
CCAAGAAACCCGCTAAGAACCTCAAGATGCCCGGCGTCTACTATGTGGACAGAAGACT  
GGAAAGAATCAAGGAGGCCGACAAAGAGACCTACGTGAGCAGCACGAGGTGGCTGT  
GGCCAGATACTGCGACCTCCCTAGCAAACCTGGGGCACAACTTAATTGA

sgRNA2.0, mKate, Splice Donor, Splice Acceptor, Polypyrimidine tract, Branch Point, Guide cloning site

### *MALAT1 terminator*

GATTCGTCAGTAGGGTTGTAAAGTTTTTCTTTTCCTGAGAAAACAACCTTTTTGTTTTCT  
CAGGTTTTGCTTTTTGGCCTTTCCCTAGCTTTAAAAAAGCAAAGACGCTGGTG  
GCTGGCACTCCTGGTTCCAGGACGGGGTTCAAGTCCCTGCGGTGTCTTTGCTT

### *3' Box terminator*

ACTTTCTGGAGTTTCAAAGTAGACTGTACGCTAAGGGTCATATCTTTTTTTGTTTGGTT  
TGTGTCTTGGTTGGCGTCTTAA

### *Barcode\_library*

TAACGAGGCGAAGACTAGTGCNNCANNGTNNAGNNACNNAGCTCACGTCCGAGACG  
GACGTCTCCGCCATGGACNNGANNNTCNNTCNNGANNGTAAATGTCTTCTGGCATTG  
C

Variable Bases, Buffer sequence, Dual BsmBI placeholder

\*variable bases are 25% of each base at each site

*tRNA variant library*

CGTCTCtcgtcGGCTCGTNNGTCTNNNNNNNTGATTCTCGCTTAGGGT GCGAGAGGTCCC  
GGGNNNNNNNCCCGGACGAGCCctGAGACG

tRNA<sup>Pro</sup>, Variable Bases

\*variable bases are 82% of the wild-type base and 6% each of the three other possible bases at that location

## Supplementary Tables

| Oligo Pair | Forward                                                      | Reverse                                                     |
|------------|--------------------------------------------------------------|-------------------------------------------------------------|
| 1          | GCTAGCGGTACCGGTACTTGGAGCGGCCGC                               | GGCGCCGGTACCCGATAGAGAAATGTTCTGGCACCTG                       |
| 2          | TTTTGCTCACATGTGCATGCGGAGCGGCCGCAATAAAATATCT                  | CTAGGGCGTGGCAAGTGTA                                         |
| 3          | CAGTGCAAGTGCAGGTGCCA                                         | GCGGCCGGCCTGCAC                                             |
| 4          | CCCGGCTGGTGCAGGCGGCCGCTTC                                    | GCCACCTGACGTCCCTGCAGGCTCGAGGGATCCTATCGATTTTACC              |
| 5          | ACGGAGACGTCGAATGTGTGTAGTTAGGGTG                              | TACGTCTCGAGTTAGTCTCACTCATTAGGCAC                            |
| 6          | TGCTTACATGTGAATGTGTGTAGTTAG                                  | CTAACCTCGAGCAAGCTCTAGCTAGAGGTCCG                            |
| 7          | CGAGAAGACCTGTTTTAGAGCTAG                                     | GAAGCGCCGGCCAAAAAGCACCAGCTCG                                |
| 8          | ACGTTGGCGCGCCGAGCATTAGTTCATAGCCCATATATGG                     | GCAACGAGCTCGACCGGTGGATCTG                                   |
| 9          | AAGTAGAGCTCGCCACCATTGGTGTCTAAGG                              | AATGAGCGCCGCTCAATTAAGTTTGTGCCCA                             |
| 10         | TGCCAGAAGACATGGAGACGGACGCTCCGTTTTAG                          | GAGGCGAAGACTAGCACCAGCTCGGTGCCA                              |
| 11         | GAGGCGAAGACTAGTGCAGCGCCGCTGGTCCC                             | AAGTAGCGCCGCTCCATTCCGCTAGCC                                 |
| 12         | ATTTAGAAGACAACGCGCCGTAAGTCGGAGTACTGCTCTTTTTAGAGC             | GAGGCGAAGACTAGCACCAGCTCGGTGCCA                              |
| 13         | ATTTAGAAGACAACCGGTGTAAGTCGGAGTACTGCTCTTTTTAGAGC              | "                                                           |
| 14         | TGCCAGAAGACATGTGCGATTTCGTCAGTAGGGTTGTAAGG                    | TGCCAGAAGACATTCGAGAAGCAAGACACCGCAGG                         |
| 15         | ATTTAGAAGACAAGTGCAGGATCCACTTTCGAGTTTCAAAG                    | ATTTAGAAGACAATCGAGTTAAGACGCCAACCAAG                         |
| 16         | TGGATGCGCGCCTAGTGAACCGTCAGATCCAC                             | ACAGAGAGCTCAGTTATTAGTCCCTCGACG                              |
| 17         | ACGTTGGCGCGCCGAGCATTAGTTCATAGCCCATATATGG                     | ACAGAGAGCTCAGTTATTAGTCCCTCGACG                              |
| 18         | AGCACGAGCTCGTAAGTCGGAGTACTGCTCTTTTTAGAG                      | TCGAAGACCCGACCCGACTCGGTGCC                                  |
| 19         | TAAGAAGACTAGTAAGTCGGAGTACTGCTCTTTTTAGAG                      | GAAGCGCCGGCCAAAAAGC                                         |
| 20         | TAACGAGGCGAAGACTAGTGC                                        | GCAATGCCAGAAGACATTTAC                                       |
| 21         | TAACGTCTCTCGTCGGCTCG                                         | TAACGTCTCAGGGCTCGTCC                                        |
| 22         | ATGATGCAACTCGTAGGACAGGTG                                     | CATGCACCTGTCCCTACAGTTGCA                                    |
| 23         | CATGCCAACATGTCTTCGAATTCGAAGACTAGGACGGCCGG                    | CCGTCTTAGTCTTCGAATTCGAAGACATGTTGG                           |
| 24         | GCCCGGAGACGGGAATTCACGTCTCCGTTTTAGAGCTAGAAATAGCAAGTTAAATA     | GCCTTATTTTAACTTGCTATTTCTAGCTCTAAAACGGAGACGTGAATCCCGTCTCC    |
| 25         | AGGCTAGTCCGTTATCAACTTGAAAAAGTGGCACCAGTCGGTGC                 | GGTTGCACCAGCTCGGTGCCACTTTTTCAAGTTGATAACGGACTA               |
| 26         | AAGGAGAAGACTAGCCCGGAGACGGACGCTCCGTTTTAGAG                    | AAGGAGAAGACAAGGTTGCACCAGCTCGGTGCCA                          |
| 27         | GCCCTGGGAAGCAGAGGCAAAAGG                                     | AAACCCCTTGCCTCTGCTTCCCA                                     |
| 28         | GCCCTCTTCTTGGTATGGTCCCTAA                                    | AAACTTAGGACCATACCAAGAAGA                                    |
| 29         | AAGGAGAAGACAAC TAGCGTTACATAACTTACGGTAAATG                    | AAGGAGAAGACAAGTTGGACCGTGGATCTGACG                           |
| 30         | AAGGAGCTAGCCCGGTAGGGGAGGC                                    | AAGGAGAAGACAACCCGACCGCTAAGCTTGG                             |
| 31         | TTAACGCTAGCGGCAGTGGAGAGGCAGAG                                | TAGTTAGAATTCACAGGACCCGGC                                    |
| 32         | TTAAAGAAGACTTCCCAATGGCCAAGTTGACCAGTGCC                       | AGTTAGAATTCACAGTCTGCTCTCGGCC                                |
| 33         | CTAGCGGAGTGGAGAGGCGAGGAAGTCTGCTAACATGCGGTGACGTGAGGAGAATCCTGG | TGGGCCAGGATTCCTCGACGTACCCGATGTAGCAGACTTCCCTGCCCTCTCCACTGCCG |
| 34         | CTAGCTAAGTGTACAAGTAAG                                        | AATCTTACTTGTACACTTAG                                        |
| 35         | CATGTGATATCACAAATGGCT                                        | CTAGAGCCATTTGTGATATCA                                       |

**Supplementary Table 1.** Miscellaneous oligos used in cloning.

| Oligo Name                  | Forward                                                                              | Reverse                                                                              |
|-----------------------------|--------------------------------------------------------------------------------------|--------------------------------------------------------------------------------------|
| Hist1h3h term               | GTGCGTCTCAAGGACTCACTGATTACATACCCAAAGGCTCTTTTCAGAGCCACCACATGCGCGCTGAAAAGATCTGTTTCTCTC | TCGAGAGAGAAACAGATCTTTTCAGCGCGCATGTGGTGGCTCTGAAAAGAGCCCTTTGGGTATGTAATCAGTGAGTCTTGAGAC |
| min-pA                      | GTGCTCCTTTATCTTTCATTGGATCCGTGTGTGGTTTTTGTGTGCGGCCGCTAC                               | TCGAGGTAGACGGGCCGACACAAAAACACACACGGATCCAATGAAGATAAAGGA                               |
| HH_CTS2                     | CACCTTACCTGATGAGTCCGTGAGGACGAAACGAGTAAGCTCGTCGTAAGTCGGAGTACTGTCCT                    | AAACAGGACAGTACTCCGACTTACGACGAGCTTACTCGTTTCGCTCTCCGACTCATCAGGTAAGTGAGCT               |
| CTS2-IRNAGly                | TGCAGTAAGTCGGAGTACTGTCCT                                                             | AAACAGGACAGTACTCCGACTTAC                                                             |
| CTS2-IRNAPro                | GCCCGTAAGTCGGAGTACTGTCCT                                                             | "                                                                                    |
| CTS2-IRNAGln                | ACCTGTAAGTCGGAGTACTGTCCT                                                             | "                                                                                    |
| CTS2-intron                 | GTCCGTAAGTCGGAGTACTGTCCT                                                             | "                                                                                    |
| CTS2-Csy4                   | CAGCGTAAGTCGGAGTACTGTCCT                                                             | "                                                                                    |
| iBlueRemover                | TCGAAATCGCCTGCAGGGATACACGT                                                           | GTATCCCTGCAGGCGATT                                                                   |
| Bpil_placeholder            | GTGCGGGTCTTCGAGAAGACCT                                                               | TTACAGGTCTTCTCGAAGACCC                                                               |
| hu-tRNAGly                  | CATCGGTGCATGGGTGGTTAGTGGTAGAATTTCTGCCTGCCACGCGGGAGGCCGGGTTCGATTCCCGGCCCA             | TGCATGGCCCGGGAATCGAACC CGGCTCCCGCTGGCAGGCGAGAATTTCTACCCTGAAACCCCATGCaccgatGAGCT      |
| rice-tRNAGly                | CAACAAAGCACCAGTGGTCTAGTGGTGAATAGTACCCTGCCACGGTACAGACCCGGGTTCGATTCCCGGCTGG            | TGCACCAGCCGGGAATCGAACC CGGCTCTGTACCCTGGCAGGGTACTATTCCACCCTAGACCCTGGTGTGTTGTTGAGCT    |
| fly-tRNAGly Part 1          | CGGGCTTTGAGTGTGTGTAGACATCAAGCATCGTGGTTCAGTGGTAGAATG                                  | CGAGCATTTACCCTGAAACCACCGATGCTTGATGCTACACACTCAAGCCCGAGCT                              |
| fly-tRNAGly Part 2          | CTCGCTGCCACGCGGGCGGCCGGGTTCGATTCCCGGCCGA                                             | TGCATCGCCGGGAATCGAACC CGGCGCCCGCTGGCAGG                                              |
| hu-tRNAGln                  | CGGTTCCATGGTGAATGGTTAGCACTCTGGACTCTGAATCCAGCATCCGAGTTCAAATCTCGGTGGA                  | AGGTTCCACCAGAGATTTGAACTCGGATCGCTGGATTACAGAGTCCAGAGTGTAAACATTACACCATGGAACCGAGCT       |
| hu-tRNAPro Part 1           | CGGCTCGTTGGTCTAGGGGTATGATTCTCGCTTAGGGTGC                                             | CCTAAGCGAGAATCATACCCCTAGACCAACGAGCCGAGCT                                             |
| hu-tRNAPro Part 2           | GAGAGGTCCCGGGTTCAAATCCCGGACGA                                                        | GGGCTCGTCCGGGATTTAACC CGGACCTCTCGCAC                                                 |
| G9C hu-tRNAPro Part 1       | CGGCTCGTTGGTCTAGGGGTATGATTCTCGCTTAGGGTGC                                             | CCTAAGCGAGAATCATACCCCTAGACCAACGAGCCGAGCT                                             |
| G16C hu-tRNAPro Part 1      | CGGCTCGTTGGTCTAGGGGTATGATTCTCGCTTAGGGTGC                                             | CCTAAGCGAGAATCATACCCCTAGACCAACGAGCCGAGCT                                             |
| G17T hu-tRNAPro Part 1      | CGGCTCGTTGGTCTAGGGGTATGATTCTCGCTTAGGGTGC                                             | CCTAAGCGAGAATCATACCCCTAGACCAACGAGCCGAGCT                                             |
| G17A/A20G hu-tRNAPro Part 1 | CGGCTCGTTGGTCTAGGGGTATGATTCTCGCTTAGGGTGC                                             | CCTAAGCGAGAATCATACCCCTAGACCAACGAGCCGAGCT                                             |
| G18T hu-tRNAPro Part 1      | CGGCTCGTTGGTCTAGGGGTATGATTCTCGCTTAGGGTGC                                             | CCTAAGCGAGAATCATACCCCTAGACCAACGAGCCGAGCT                                             |
| T54C/A58C hu-tRNAPro Part 2 | GAGAGTCCCGGGTCCAACTCCCGGACGA                                                         | GGGCTCGTCCGGGATTTGACCCGGGACCTCTCGCAC                                                 |
| C55A hu-tRNAPro Part 2      | GAGAGTCCCGGGTTAAATCCCGGACGA                                                          | GGGCTCGTCCGGGATTTAACC CGGACCTCTCGCAC                                                 |
| C55G hu-tRNAPro Part 2      | GAGAGTCCCGGGTTGAAATCCCGGACGA                                                         | GGGCTCGTCCGGGATTTAACC CGGACCTCTCGCAC                                                 |
| A56T hu-tRNAPro Part 2      | GAGAGTCCCGGGTTCTAATCCCGGACGA                                                         | GGGCTCGTCCGGGATTAGAACC CGGACCTCTCGCAC                                                |
| A58T/T59A hu-tRNAPro Part 2 | GAGAGTCCCGGGTTCAATCCCGGACGA                                                          | GGGCTCGTCCGGGATTTAACC CGGACCTCTCGCAC                                                 |
| A56T/T59C hu-tRNAPro Part 2 | GAGAGTCCCGGGTTCAATCCCGGACGA                                                          | GGGCTCGTCCGGGTTAGAACC CGGACCTCTCGCAC                                                 |
| del/C55A hu-tRNAPro         | CGGCTCGTTGGGAGTCCCGGGTTAAATCCCGGACGA                                                 | GGGCTCGTCCGGGATTTAACC CGGACCTCCCAACGAGCCGAGCT                                        |
| del/T54C/A58C hu-tRNAPro    | CGGCTCGTTGGGAGTCCCGGGTCCAACTCCCGGACGA                                                | GGGCTCGTCCGGGATTTGACCCGGGACCTCCCAACGAGCCGAGCT                                        |
| del/G9C/A56T hu-tRNAPro     | CGGCTCGTTGGGAGTCCCGGGTTCTAATCCCGGACGA                                                | GGGCTCGTCCGGGATTTAGAACC CGGACCTCCCAACGAGCCGAGCT                                      |
| del/C55G hu-tRNAPro         | CGGCTCGTTGGGAGTCCCGGGTTGAAATCCCGGACGA                                                | GGGCTCGTCCGGGATTTAACC CGGACCTCCCAACGAGCCGAGCT                                        |
| del/C55G hu-tRNAGly         | CATCGGTGCATGGTGGGAGGCCGGGTTCGATTCCCGGCCCA                                            | TGCATGGCCCGGGAATCGAACC CGGCTCCCAACCATGCACCGATGAGCT                                   |
| del hu-tRNAGly              | CATCGGTGCATGGTGGGAGGCCGGGTTCGATTCCCGGCCCA                                            | TGCATGGCCCGGGAATCGAACC CGGCTCCCAACCATGCACCGATGAGCT                                   |

**Supplementary Table 2.** Annealed oligonucleotides used in cloning experiments.

| Forward Primer Name           | Forward Primer Sequence                                               | Reverse Primer Name    | Reverse Primer Sequence                                    |
|-------------------------------|-----------------------------------------------------------------------|------------------------|------------------------------------------------------------|
| Amp_Pro_F                     | ATCCAGGCCGGCCGGCTCGTTGGTCTAGGGG                                       | Amp_Pro_R              | AACGTGGCCGGCCGGGCTCGTCCGGG                                 |
| Amp_Pro_G9C_F                 | ATCCAGGCCGGCCGGCTCGTTGGTCTAGGGG                                       | Amp_Pro_R              | AACGTGGCCGGCCGGGCTCGTCCGGG                                 |
| Amp_Pro_del_F                 | ATCCAGGCCGGCCGGCTCGTTGGGAGGTC                                         | Amp_Pro_R              | AACGTGGCCGGCCGGGCTCGTCCGGG                                 |
| Amp_Pro_delG9C_F              | ATCCAGGCCGGCCGGCTCGTTGGGAGGTC                                         | Amp_Pro_R              | AACGTGGCCGGCCGGGCTCGTCCGGG                                 |
| Amp_ProG17A_F                 | ATCCAGGCCGGCCGGCTCGTTGGTCTAGGAG                                       | Amp_Pro_R              | AACGTGGCCGGCCGGGCTCGTCCGGG                                 |
| Amp_Pro_del_F                 | ATCCAGGCCGGCCGGCTCGTTGGGAGGTC                                         | Amp_Pro_R              | AACGTGGCCGGCCGGGCTCGTCCGGG                                 |
| Amp_ProG17T_F                 | ATCCAGGCCGGCCGGCTCGTTGGTCTAGGTG                                       | Amp_Pro_R              | AACGTGGCCGGCCGGGCTCGTCCGGG                                 |
| Amp_ProG18T_F                 | ATCCAGGCCGGCCGGCTCGTTGGTCTAGGGT                                       | Amp_Pro_R              | AACGTGGCCGGCCGGGCTCGTCCGGG                                 |
| Amp_Gly_del-F                 | ATCCAGGCCGGCCATCGGTGCATGGGTGG                                         | Amp_Gly_del-R          | AACGTGGCCGGCCTGCATGGGCCGGGA                                |
| minCsy4-CTS2-F                | TGCCAGAGCTCCTGCCGTATAGGCAGCGTAAGTCGGAGTACTGTCCTGTTTTAGAGC             | minCys4-sgRNA-R        | TGCCAGGCCGGCCGCTGCCTATACGGCAGGCACCGACTCGGTGCCA             |
| FullCsy4-CTS2-F               | AAAAAGAGCTCGTTCACTGCCGTATAGGCAGCTAAGAAAGTAAGTCGGAGTACTGTCCTGTTTTAGAGC | FullCsy4-sgRNA-R       | AAAAAGGCCGGCCTTTCTTAGCTGCCTATACGGCAGTGAACGCACCGACTCGGTGCCA |
| SacI-Csy4nano-plch-F          | TGCCAGAGCTCACTGCCGTATAGGCAGCGGAGACGGACTCTCCGTTTTAG                    | Csy4nano-sgRNA-R       | TAAAGGCCGGCCGCTGCCTATACGGCAGTGCACCGACTCGGTGCCA             |
| Bpil-CAAC-5p-tRNApro-F        | AAGGAGAAGACTACAACCGCTCGTTGGGAGGTC                                     | Bpil-GCCC-5p-tRNApro-R | AAGGAGAAGACAAGGGCTCGTCCGGGATTT                             |
| Bpil-14bpBuf-3p-del-tRNApro-F | AAGGAGAAGACAAAACCAAGTTTGTGTGGCTCGTTGGGAGGT                            | 3p-del-tRNApro-R       | AAGGAGAAGACTAGTCCCGGCTCGTCCGGGA                            |
| Bpil-CAAC-5p-WT-tRNApro-F     | AAGGAGAAGACTACAACCGCTCGTTGGTCTAGGGG                                   | Bpil-GCCC-5p-tRNApro-R | AAGGAGAAGACAAGGGCTCGTCCGGGATTT                             |
| Bpil-14bpBuf-3p-WT-tRNApro-F  | AAGGAGAAGACAAAACCAAGTTTGTGTGGCTCGTTGGTCTAGGGG                         | 3p-del-tRNApro-R       | AAGGAGAAGACTAGTCCCGGCTCGTCCGGGA                            |

**Supplementary Table 3.** Primers used for tRNA and Csy4 amplification.

| Forward Primer Name | Forward Primer Sequence                            | Reverse Primer Name | Reverse Primer Sequence                               |
|---------------------|----------------------------------------------------|---------------------|-------------------------------------------------------|
| cRT-sgRNA1_LIB_F    | ACACTCITTCCTACACGACGCTCTCCGATCTGGCTAGTCCGTTATCAACT | cRT-CTS2_LIB_R      | GTGACTGGAGTTCAGACGTGTGCTCTCCGATCTAGGACAGTACTCCGACTTAC |
| cRT-sgRNA_nest_F    | TAGCAAGTTAAAATAAGGCTAGT                            | cRT-CTS2_nest_R     | CTAGTCTAAAACAGGACAGT                                  |
| CTS2_qPCR-F         | AGTCGGAGTACTGTCCTGTT                               | sgRNA_qPCR_common-R | GGACTAGCCTTATTTAACTTGCT                               |
| dCas9_qPCR-F        | CCCAAGAGGAACAGCGATAAG                              | dCas9_qPCR-R        | CCACCACCAGCACAGAATAG                                  |
| cRT-sgRNA1_v2_F     | GGCTAGTCCGTTATCAACT                                | cRT-CTS2_R          | AGGACAGTACTCCGACTTAC                                  |

**Supplementary Table 4.** Primers used for RNA circularization assays and qPCR.

| Sample Type (cRNA/pDNA) | Replicate | CMV (+/-) | Forward Index Name | Forward Index Sequence                                    | Reverse Index Name | Reverse Index Sequence                                 |
|-------------------------|-----------|-----------|--------------------|-----------------------------------------------------------|--------------------|--------------------------------------------------------|
| circRNA                 | 1         | -         | D508               | AATGATACGGCGACCACCAGAGATCTACACGTACTGACACACTCTTTCCTACACGAC | D701               | CAAGCAGAAGACGGCATAACGAGATCGAGTAATGTGACTGGAGTTCAGACGTGT |
| circRNA                 | 2         | -         | D508               | AATGATACGGCGACCACCAGAGATCTACACGTACTGACACACTCTTTCCTACACGAC | D702               | CAAGCAGAAGACGGCATAACGAGATTCCTCCGAGTGACTGGAGTTCAGACGTGT |
| circRNA                 | 3         | -         | D508               | AATGATACGGCGACCACCAGAGATCTACACGTACTGACACACTCTTTCCTACACGAC | D703               | CAAGCAGAAGACGGCATAACGAGATAATGAGCGGTGACTGGAGTTCAGACGTGT |
| circRNA                 | 1         | +         | D508               | AATGATACGGCGACCACCAGAGATCTACACGTACTGACACACTCTTTCCTACACGAC | D704               | CAAGCAGAAGACGGCATAACGAGATGGAATCTCGTACTGGAGTTCAGACGTGT  |
| circRNA                 | 2         | +         | D508               | AATGATACGGCGACCACCAGAGATCTACACGTACTGACACACTCTTTCCTACACGAC | D705               | CAAGCAGAAGACGGCATAACGAGATTTCTGAATGTGACTGGAGTTCAGACGTGT |
| circRNA                 | 3         | +         | D508               | AATGATACGGCGACCACCAGAGATCTACACGTACTGACACACTCTTTCCTACACGAC | D706               | CAAGCAGAAGACGGCATAACGAGATACGAATTCGTGACTGGAGTTCAGACGTGT |
| pDNA                    | 1         | -         | D508               | AATGATACGGCGACCACCAGAGATCTACACGTACTGACACACTCTTTCCTACACGAC | D707               | CAAGCAGAAGACGGCATAACGAGATAGCTTCAGGTGACTGGAGTTCAGACGTGT |
| pDNA                    | 2         | -         | D508               | AATGATACGGCGACCACCAGAGATCTACACGTACTGACACACTCTTTCCTACACGAC | D708               | CAAGCAGAAGACGGCATAACGAGATGCGCATTAGTACTGGAGTTCAGACGTGT  |
| pDNA                    | 3         | -         | D508               | AATGATACGGCGACCACCAGAGATCTACACGTACTGACACACTCTTTCCTACACGAC | D709               | CAAGCAGAAGACGGCATAACGAGATCATAGCCGGTACTGGAGTTCAGACGTGT  |
| pDNA                    | 1         | +         | D508               | AATGATACGGCGACCACCAGAGATCTACACGTACTGACACACTCTTTCCTACACGAC | D710               | CAAGCAGAAGACGGCATAACGAGATTTCCGGAGTACTGGAGTTCAGACGTGT   |
| pDNA                    | 2         | +         | D508               | AATGATACGGCGACCACCAGAGATCTACACGTACTGACACACTCTTTCCTACACGAC | D711               | CAAGCAGAAGACGGCATAACGAGATGCGCGAGAGTACTGGAGTTCAGACGTGT  |
| pDNA                    | 3         | +         | D508               | AATGATACGGCGACCACCAGAGATCTACACGTACTGACACACTCTTTCCTACACGAC | D712               | CAAGCAGAAGACGGCATAACGAGATCTATCGCTGTACTGGAGTTCAGACGTGT  |

**Supplementary Table 5. Deep sequencing indexes.**
